# Supplementary material for: Engineering the intermediate adduct phase to control the crystallization of perovskites for efficient and stable perovskite solar cells
Source: Royal Society of Chemistry journal article supplement (doi:10.1039/d3qm00537b), 2023-01-01
Supplement: d3qm00537b1.pdf [file d3qm00537b1.pdf]

## **Engineering the intermediate adduct phase to control the crystallization of perovskites for efficient and stable perovskite solar cells**

Muhammad Mateen,<sup>‡a</sup> Ziyu Li,<sup>‡a</sup> Hongxi Shi,<sup>a</sup> Hao Huang,<sup>a</sup> Danish Khan <sup>b</sup>, Raja Azhar Ashraaf khan <sup>a</sup>, Muhammad Rafiq<sup>c</sup>, Jawad Ali Shah Syed <sup>d</sup>, Afshan Khaliq <sup>a</sup>, Ghulam Abbas Ashraf <sup>a</sup>, Jadel Tsiba Matondo <sup>e</sup>, Zhangbo Lu <sup>a</sup>, Dan Chi <sup>a,\*</sup>, Shihua Huang<sup>a,\*</sup>.

<sup>[a]</sup> Provincial Key Laboratory of Solid-State Optoelectronic Devices Zhejiang Normal University Jinhua 321004, China.

<sup>[b]</sup> College of New Materials and New Energies, Shenzhen Technology University, Shenzhen 518118.Guangdong, China.

<sup>[c]</sup> Institute of Biomedical Materials and Engineering, College of Materials Science and Engineering, Qingdao University, Qingdao, 266071, China.

<sup>[d]</sup> National Laboratory of Solid-State Microstructure, Materials Science & Engineering Department, College of Engineering and Applied Sciences, Nanjing University, 210093, P.R China.

<sup>[e]</sup> State Key Laboratory of Alternate Electrical Power System with Renewable Energy Sources, NorthChina Electric Power University, Beijing 102206, P. R. China

\*Correspondence: chidan@zjnu.edu.cn; huangshihua@zjnu.cn

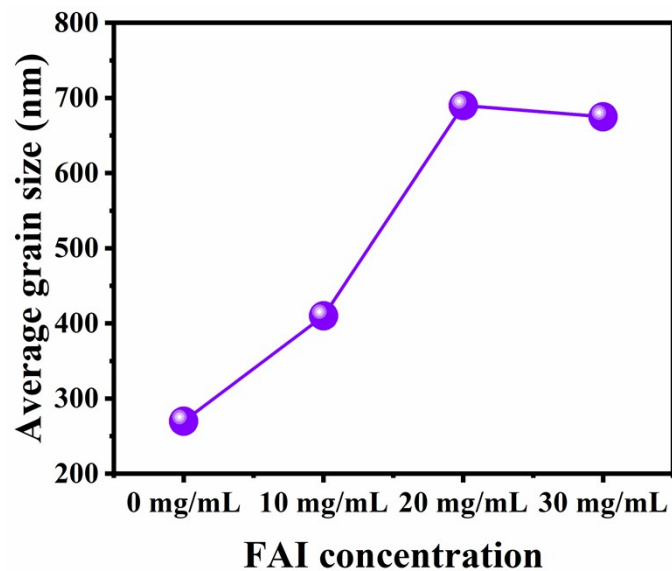

Fig. S1. Estimation of average grain size of the as-prepared perovskite films with different concentrations of FAI.

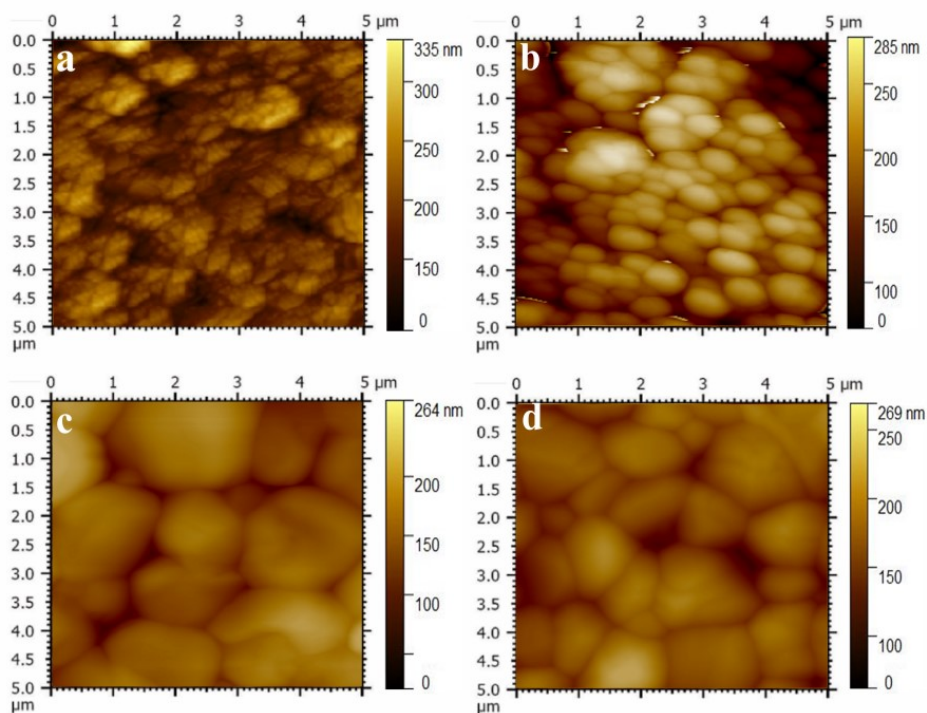

Fig. S2. AFM images of MAPbI<sub>3</sub> films treated with different concentrations of FAI. (a) 0 mg·mL<sup>-1</sup>, (b) 10 mg·mL<sup>-1</sup>, (c) 20 mg·mL<sup>-1</sup>, and (d) 30 mg·mL<sup>-1</sup> in IPA solution.

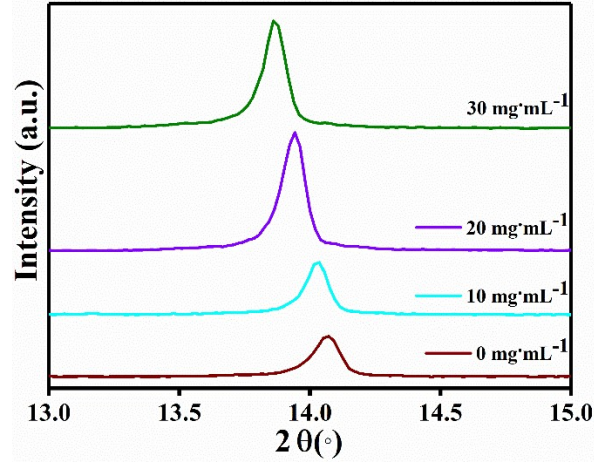

Fig. S3. Zoom in XRD peak (110) patterns of perovskite films processed with varying concentrations of FAI solution (0 mg·mL<sup>-1</sup>, 10 mg·mL<sup>-1</sup>, 20 mg·mL<sup>-1</sup>, and 30 mg·mL<sup>-1</sup>), which show peak shift of the XRD peak.

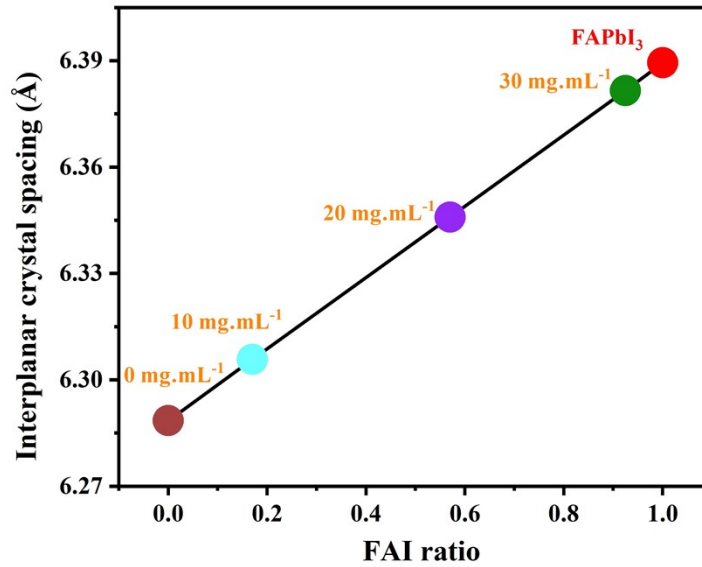

Fig. S4 The interplanar crystal spacing of the perovskites treated with different FAI contents. The interplanar crystal spacing is calculated from the Bragg equation:  $2d\sin\theta = n\lambda$  ( $\lambda = 1.5406 \text{ \AA}$ ). The line is a linear fitting of the interplanar crystal spacing.

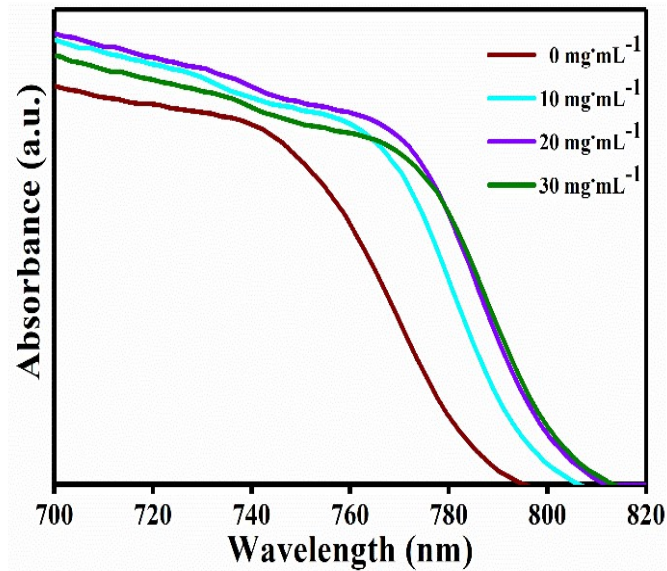

Fig. S5. Expand UV-vis absorption spectra of the prepared films processed with varying concentrations of FAI solution (0 mg·mL<sup>-1</sup>, 10 mg·mL<sup>-1</sup>, 20 mg·mL<sup>-1</sup>, and 30 mg·mL<sup>-1</sup>)

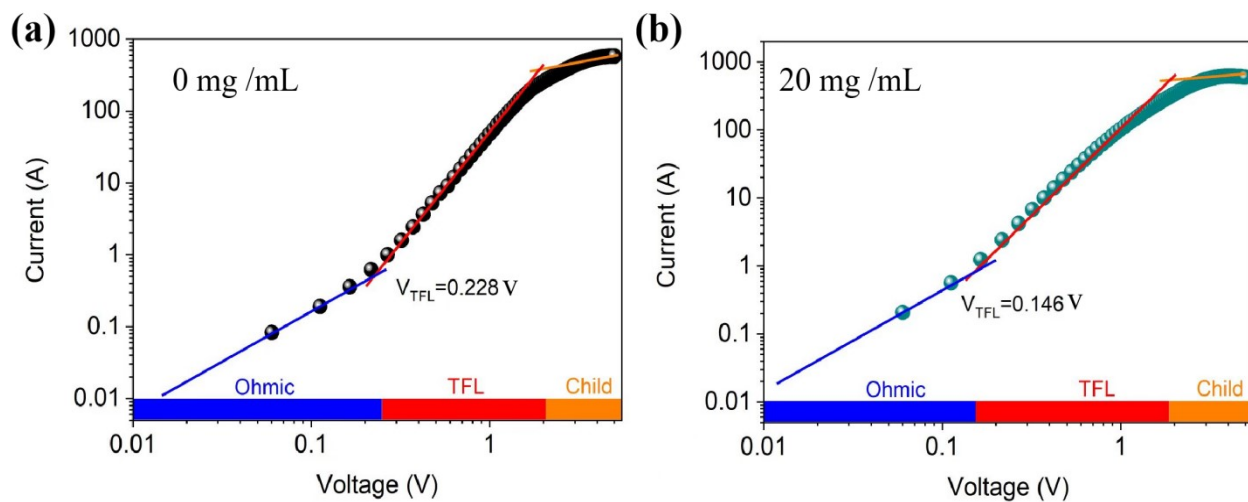

Fig. S6. Space charge limited current (SCLC) of perovskite films prepared with (a) 0 mg·mL<sup>-1</sup>, and (b) 20 mg·mL<sup>-1</sup> FAI.

**Table S1.** The decay time and the relative decay amplitude time parameters are derived from the TRPL decay curves.

| device                 | $\tau_1$ (ns) | $A_1$ (%) | $\tau_2$ (ns) | $A_2$ (%) | $\tau_{ave}$ (ns) |
|------------------------|---------------|-----------|---------------|-----------|-------------------|
| 0 mg·mL <sup>-1</sup>  | 22.53         | 37.50     | 80.12         | 49.55     | 70.01             |
| 20 mg·mL <sup>-1</sup> | 14.36         | 30.39     | 93.25         | 70.42     | 88.33             |
